# Supplementary material for: A ferrocene-modified stable metal–organic framework for efficient CO2 photoreduction reaction
Source: Royal Society of Chemistry journal article supplement (doi:10.1039/d3cc02212a), 2023-01-01
Supplement: d3cc02212a1.pdf [file d3cc02212a1.pdf]

## Supporting Information

### **Ferrocene-modified stable metal-organic framework for efficient CO<sub>2</sub> photoreduction reaction**

Gui-Qi Lai<sup>†a</sup>, Ning Li<sup>†a</sup>, Jun He<sup>\*a</sup>, and Ya-Qian Lan<sup>\*b</sup>

<sup>a</sup>School of Chemical Engineering and Light Industry, Guangdong University of Technology, Guangzhou 510006, Guangdong, China.

<sup>b</sup>School of Chemistry, South China Normal University, Guangzhou 510006, PR China.

<sup>†</sup>These authors contributed equally.

Email: junhe@gdut.edu.cn; yqlan@m.scnu.edu.cn

## Experimental Procedures

### Materials

All chemicals and reagents were purchased commercially without further purification. Ferrocenecarboxaldehyde (Fca), Ferrocene (Fc), 2-Amino-1,4-benzene dicarboxylic acid (H<sub>2</sub>aBDC, 99.0%), Nafion (5% w/w in water and 1-propanol) were purchased from Alfa Aesar. Titanium tetraisopropanolate (Ti(O*i*Pr)<sub>4</sub>, 95%), Triethanolamine (TEOA, 99%) were purchased from Aladdin. N,N-dimethylformamide (DMF, 99.5%), methanol (CH<sub>3</sub>OH) and triethylamine (Et<sub>3</sub>N, 99.0%) were purchased from Admas.

### Instruments

Fourier-transform infrared (IR spectra (4000-500 cm<sup>-1</sup>) were obtained in KBr discs on a Thermo Nicolet IS50 FTIR spectrometer. UV-Vis-NIR diffuse reflectance spectra (UV-Vis-NIR DRS) was recorded on a Varian Cary 5000 in the wavelength range of 250-800 nm. Powder X-ray diffraction (PXRD) spectra were carried out on a Rigaku Smart Lab diffractometer. Thermogravimetric analyses were performed on a Diamond DSC Pyris 1 analyzer. CO<sub>2</sub> adsorption and desorption isotherms were determined by Autosorb IQ2 (Quantachrome Instruments). X-ray photoelectron spectroscopy (XPS) was recorded using Escalab 250Xi instrument.

## Synthesis methods

### Synthesis of NM.

NM was synthesized by previous literature. 3 mmol (543 mg) of H<sub>2</sub>aBDC and 0.75 mmol (0.26 mL) of Ti(O*i*Pr)<sub>4</sub> were dissolved in 1.0 mL of methanol and 9.0 mL of DMF. The solution was stirred for 30 min, and then transferred into a 50 mL Teflon-lined stainless for 72h at 150°C. After the reaction was cooled to room temperature, light yellow microcrystalline powder was collected by centrifugation and washed with DMF and methanol. The solid was dried in a vacuum oven at 80°C for 12 h.

### Synthesis of FNM-1

0.3 mmol (64.2 mg) of Fca (*N*<sub>NH<sub>2</sub></sub>: *N*<sub>Fca</sub> = 1:1) was dissolved in 10.0 mL of methanol, 0.05 mmol (84.7 mg) of NM was added into 10.0 mL of methanol and stirred. Then the dissolved Fca solution was slowly added to NM solution, the mixed solution stirred for 30 min. Finally, 42 μL of Et<sub>3</sub>N was slowly added to the above mixed solution and stirred overnight at room temperature. The resulting dark gray turbid solution was collected by centrifugation and washed with methanol solvent several times until the color of the solution was colorless, then the microcrystalline samples were dried in a vacuum oven at 80 °C for 12 h.

## Synthesis of FNM-2

FNM-2 samples were achieved by almost the same process as that of FNM-1, except using 3.0 mmol (642.2mg) of Fca ( $N_{\text{NH}_2} : N_{\text{Fca}} = 1:10$ ) and 210  $\mu\text{L}$  of  $\text{Et}_3\text{N}$ .

## Synthesis of F@NM

The synthetic process is similar as that of FNM-1, except that NM crystals was added into 10.0 mL of methanol with 1.5 mmol (279.0 mg) Fc and stirred for 12 h. The resulting solution was collected by centrifugation and washed with methanol solvent several times until the color of the solution was colorless, then the microcrystalline samples were dried in a vacuum oven at 80 °C for 12 h.

## The generalization of the synthetic scheme

To demonstrate that this strategy is also applicable to other amino-functionalized MOFs, we prepared ferrocene-grafted  $\text{NH}_2\text{-UiO-66}$  using a similar synthetic approach, i.e., an aldehyde-amine condensation reaction using ferrocenecarboxaldehyde (Fca) and  $\text{NH}_2\text{-UiO-66}$  microcrystals.

The relevant synthesis method is as follows:

### Synthesis of $\text{NH}_2\text{-UiO-66}$

$\text{NH}_2\text{-UiO-66}$  was synthesized by previous reference with slightly modified method<sup>[a]</sup>. Typically,  $\text{NH}_2\text{BDC}$  (0.5275 mmol) and  $\text{ZrCl}_4$  (0.5675 mmol) were dispersed in 25 mL DMF and 875  $\mu\text{L}$   $\text{CH}_3\text{COOH}$  by ultrasonic treatment for 30 min. This solution was transferred into a 50 mL Teflon-lined stainless steel autoclave for 1 days at 120 °C under autogenous pressure. After cooling down to room temperature, pale pink powders were collected by filtration and fully washed several times with DMF.

[a] Li, Z.; Zhao, S.; Wang, H.; Peng, Y.; Tan, Z.; Tang, B. Functional groups influence and mechanism research of  $\text{UiO-66}$ -type metal-organic frameworks for ketoprofen delivery. *Colloids Surf. B. Biointerfaces* **2019**, *178*, 1.

### Synthesis of FN-UiO-66

0.3 mmol (64.2 mg) of Fca was dissolved in 10.0 mL of methanol, 0.03 mmol (52.5mg) of  $\text{NH}_2\text{-UiO-66}$  was added into 10.0 mL of methanol and stirred. Then the dissolved Fca solution was slowly added to  $\text{NH}_2\text{-UiO-66}$  solution, the mixed solution stirred for 30 min. Finally, 42  $\mu\text{L}$  of  $\text{Et}_3\text{N}$  was slowly added to the above mixed solution and stirred overnight at room temperature. The resulting reddish brown turbid solution was collected by centrifugation and washed with methanol solvent several times until the color of the solution was colorless, then the microcrystalline samples were dried in a vacuum oven at 80°C for 12 h.

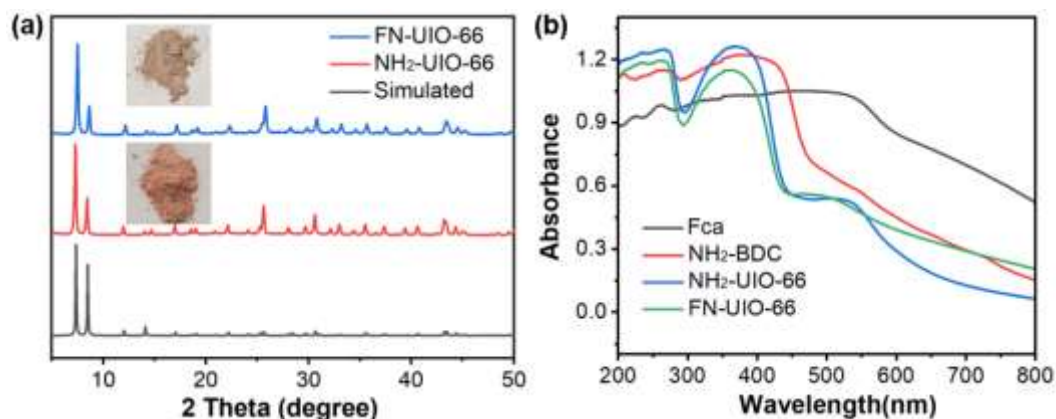

(a) Power XRD patterns of NH<sub>2</sub>-UiO-66 and FN-UiO-66; (b) UV/Vis-NIR DRS spectra of Fca ligand, NH<sub>2</sub>-BDC, NH<sub>2</sub>-UiO-66 and FN-UiO-66.

As shown in Figure R1, compared to the pristine NH<sub>2</sub>-UiO-66 structure, the ferrocene-grafted MOF not only maintains the parent framework, but also shows an improvement in light-harvesting ability (*ca.* 550-800 nm), which is consistent with the phenomenon in our work. These results suggest that this strategy can indeed be applied to other amino-functionalized MOFs.

## Photocatalytic CO<sub>2</sub> reduction experiments

The activated NM, FNM-1-2 and F@NM were used as photocatalysts to carry out CO<sub>2</sub> reduction reaction. Photocatalyst (5mg) was added into H<sub>2</sub>O (28 mL) with Triethanolamine (TEOA, 2 mL) as the sacrificial agent. After degassing with high-purity CO<sub>2</sub> for 30 minutes, the reaction was carried out under a 300 W Xe lamp with UV and a cut filter to keep the wavelengths ranging from 420 to 800 nm. The reaction temperature was controlled at 25°C by using the cooling water circulation. The photocatalytic gas products (CO, CH<sub>4</sub>, O<sub>2</sub>, H<sub>2</sub>, etc.) were detected by gas chromatograph (GC) with a flame ionization detector (FID) and a thermal conductivity (TCD) detector to analyze the different gases. The liquid products (HCOOH) were measured using ion chromatography (IC).

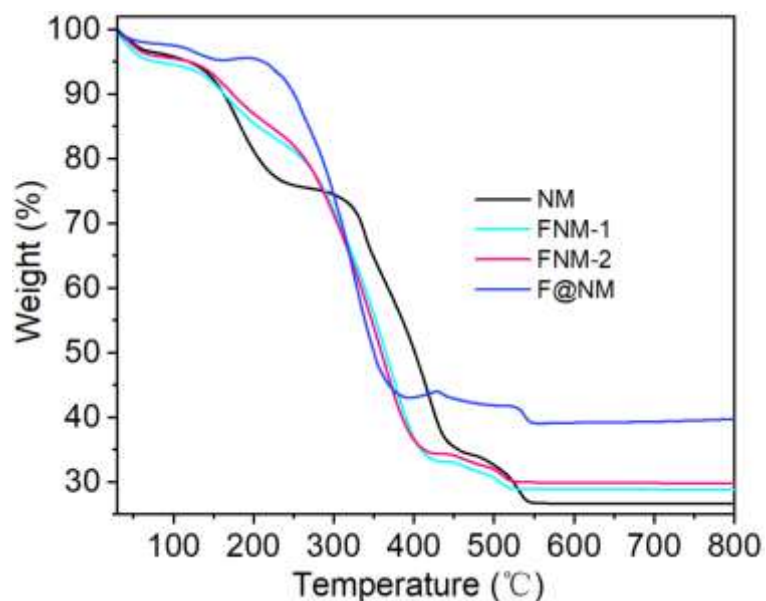

**Figure S1.** The thermogravimetric analysis of NM (black), FNM-1 (cyan), FNM-2 (pink), F@NM (blue). Compared to NM, several other ferrocene-grafted or loaded MOF-based materials have significantly higher residual oxide solid masses, and the order of the residual solid masses is  $F@NM > FNM-2 > FNM-1 > NM$ , which is consistent with the synthetic feed ratio of the reactants.

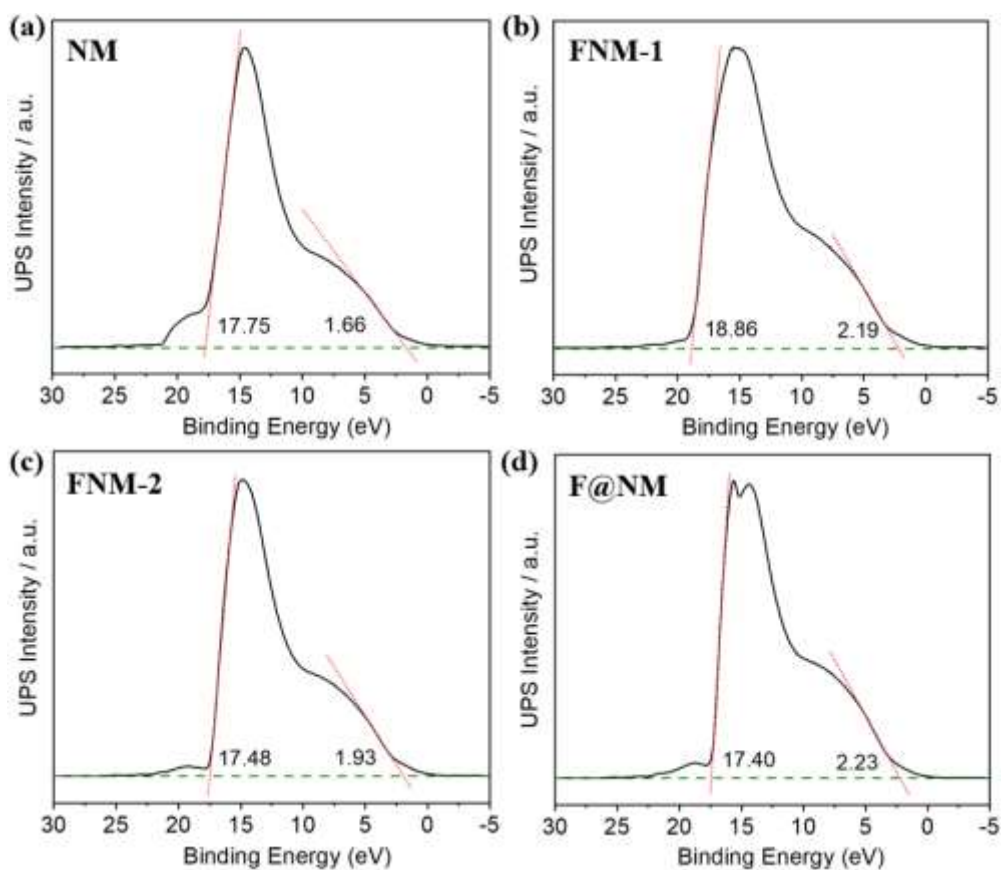

**Figure S2.** UPS spectra of NM, FNM-1, FNM-2 and F@NM

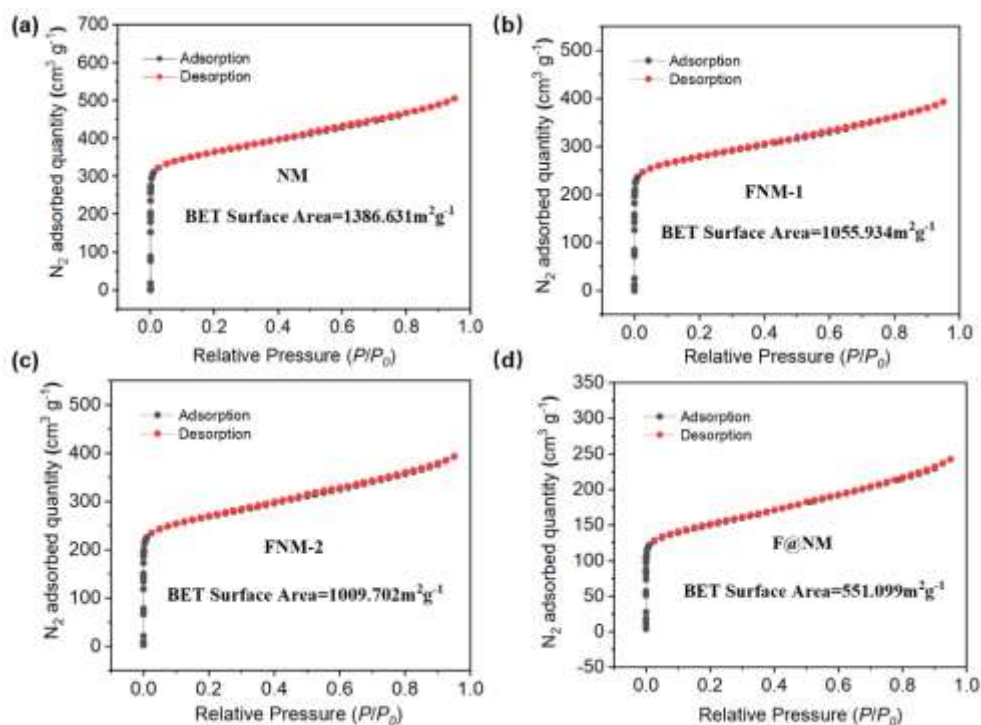

**Figure S3.** N<sub>2</sub> adsorption-desorption isotherms of NM, FNM-1, FNM-2 and F@NM compounds. The BET surface areas of FNM-1-2 and F@NM were found to be 1055.93, 1009.70 and 551.10 m<sup>2</sup> g<sup>-1</sup>.

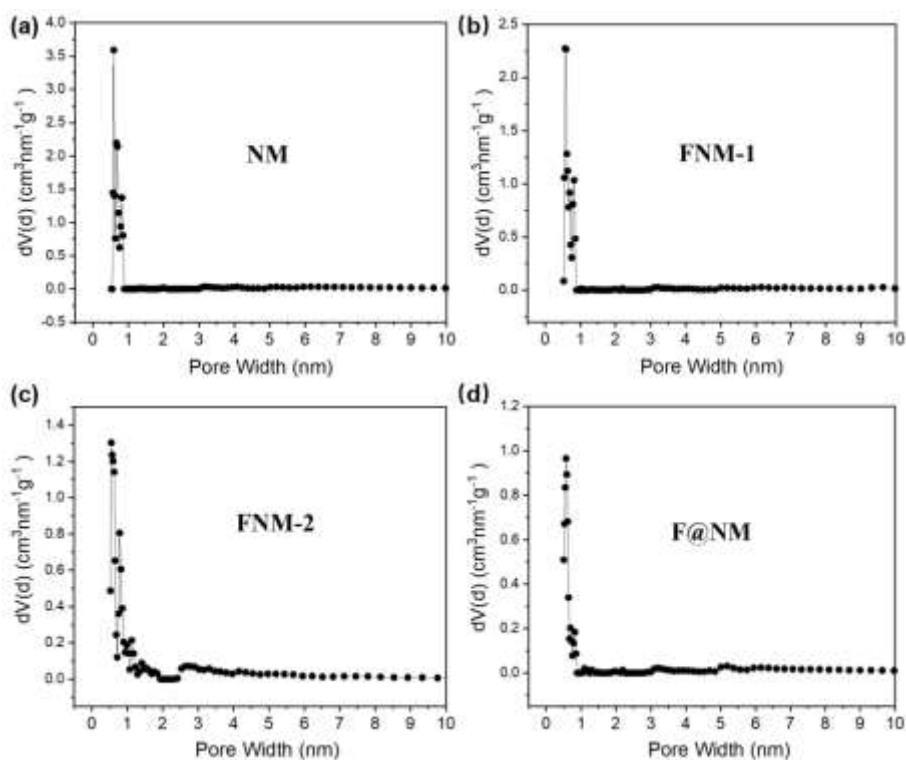

**Figure S4.** The pore size distributions for NM, FNM-1, FNM-2 and F@NM. The pore volume of

MOF decreases gradually with increasing grafting/loading amount of ferrocenes.

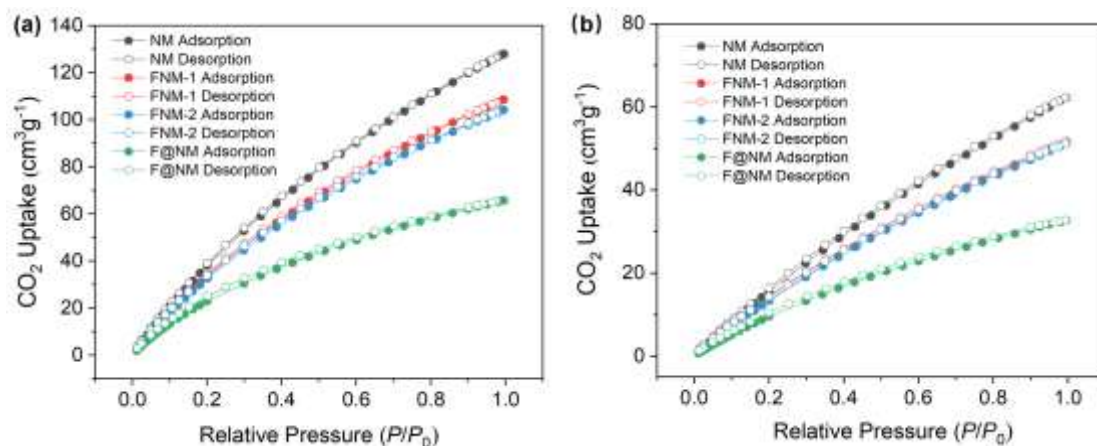

**Figure S5.** The CO<sub>2</sub> sorption isotherms of NM, FNM-1, FNM-2 and F@NM at (a) 273K and (b) 298 K. grafting or loading of ferrocenes blocked the porosity of MOF, which led to the decrease in CO<sub>2</sub> adsorption compared to the parent MOF (i.e. NM). Meanwhile, the loading of ferrocenes in the MOF structure is higher than the grafting amount, so the decrease of CO<sub>2</sub> adsorption is more obvious.

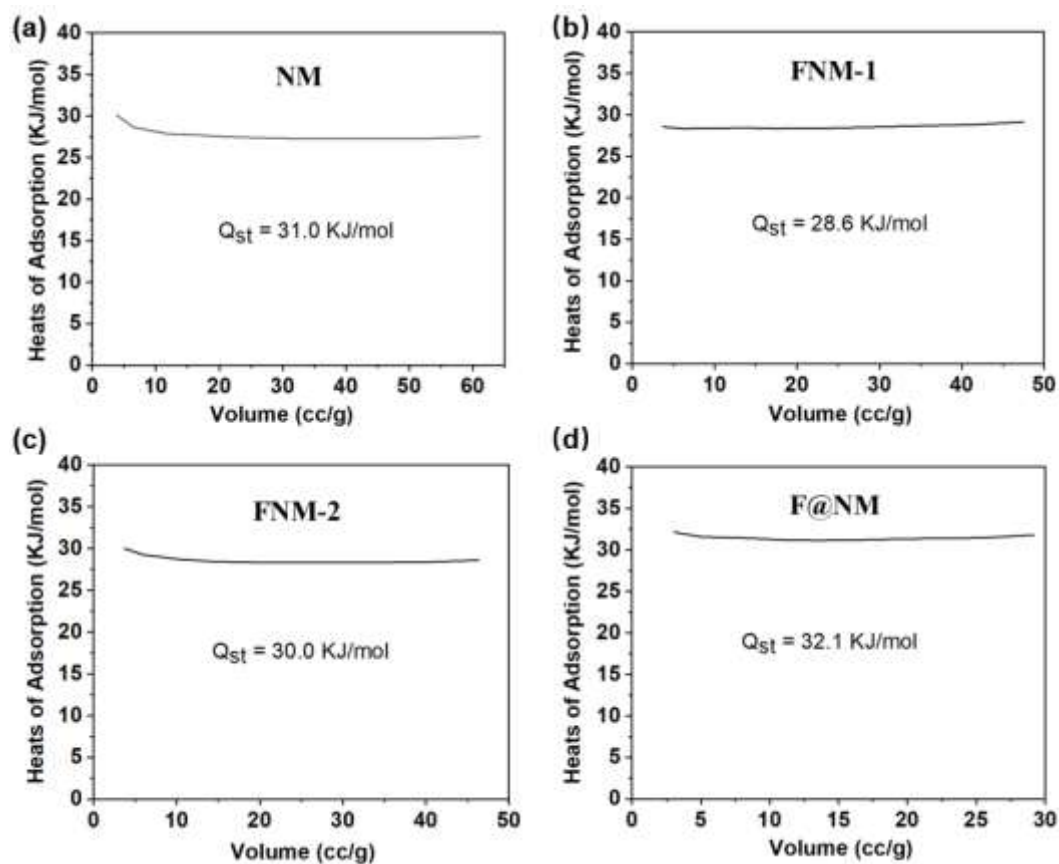

**Figure S6.** The heat adsorption (Q<sub>st</sub>) of NM, FNM-1, FNM-2 and F@NM.

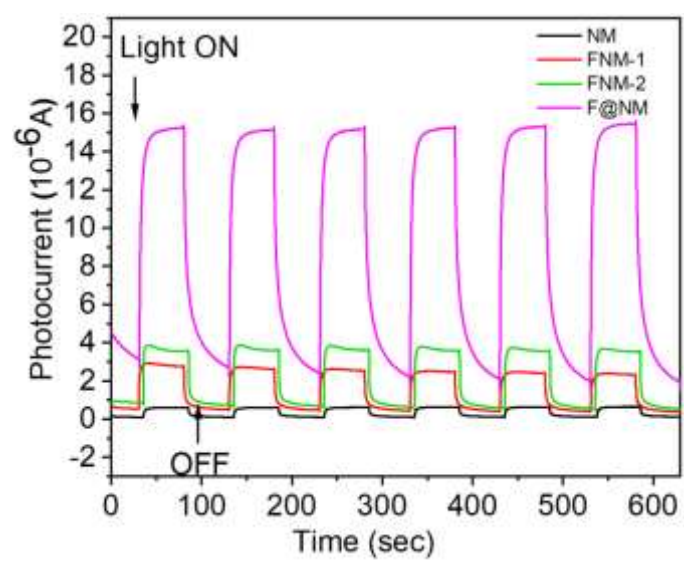

**Figure S7.** Transient photocurrent response of NM, FNM-1, FNM-2 and F@NM. A Xenon light (400-800 nm) as the light source was applied for photocurrent measurement, and 0.5 M Na<sub>2</sub>SO<sub>4</sub> aqueous solution was used as the electrolyte.



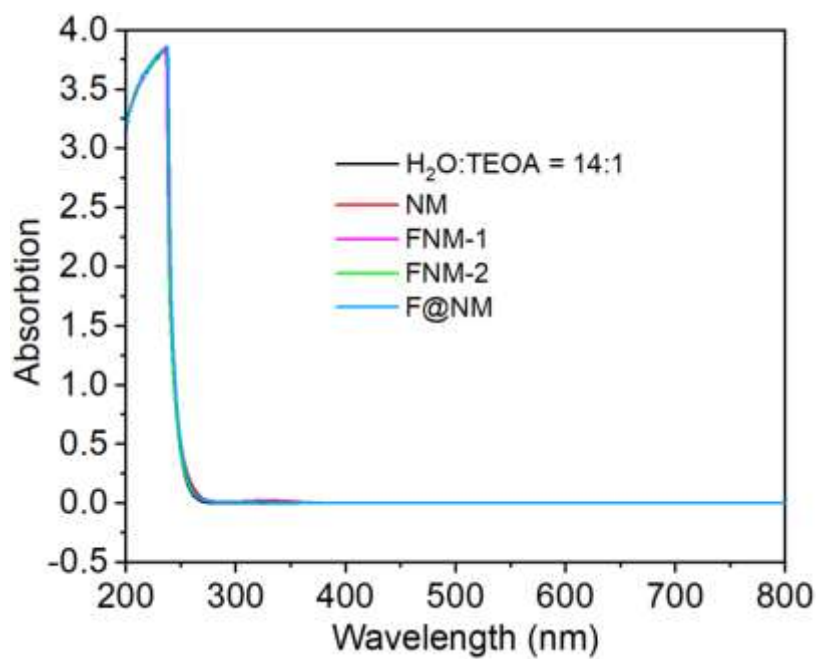

**Figure S8.** Absorption spectra of filtrate for NM, FNM-1, FNM-2 and F@NM reactive solution after photocatalytic reaction. There is no other obvious absorption peak noticed.

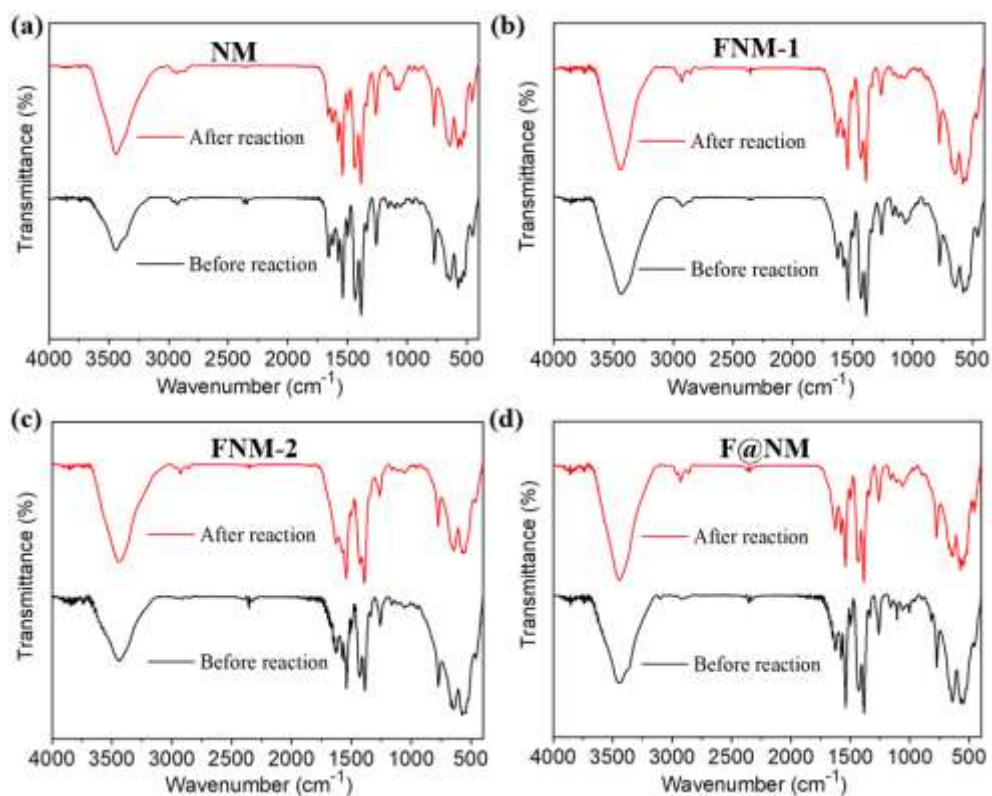

**Figure S9.** FTIR spectroscopy of NM, FNM-1, FNM-2 and F@NM compounds before (black curve) and after (red curve) photocatalytic reaction test.

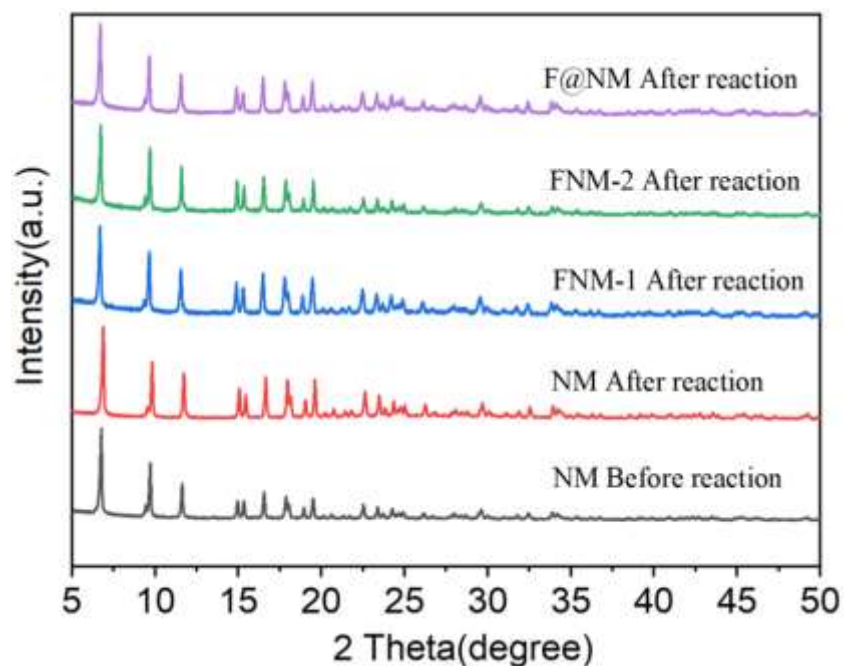

**Figure S10.** PXRD patterns of NM, FNM-1, FNM-2 and F@NM after photocatalytic reaction test. There is no other absorption peak appeared, determining that these crystal structures are stable.

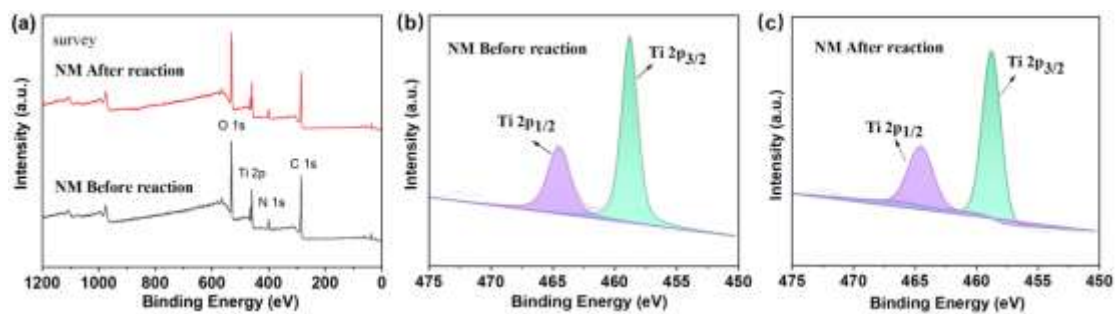

**Figure S11.** The full-scan and high-resolution XPS spectra of NM before and after reaction.

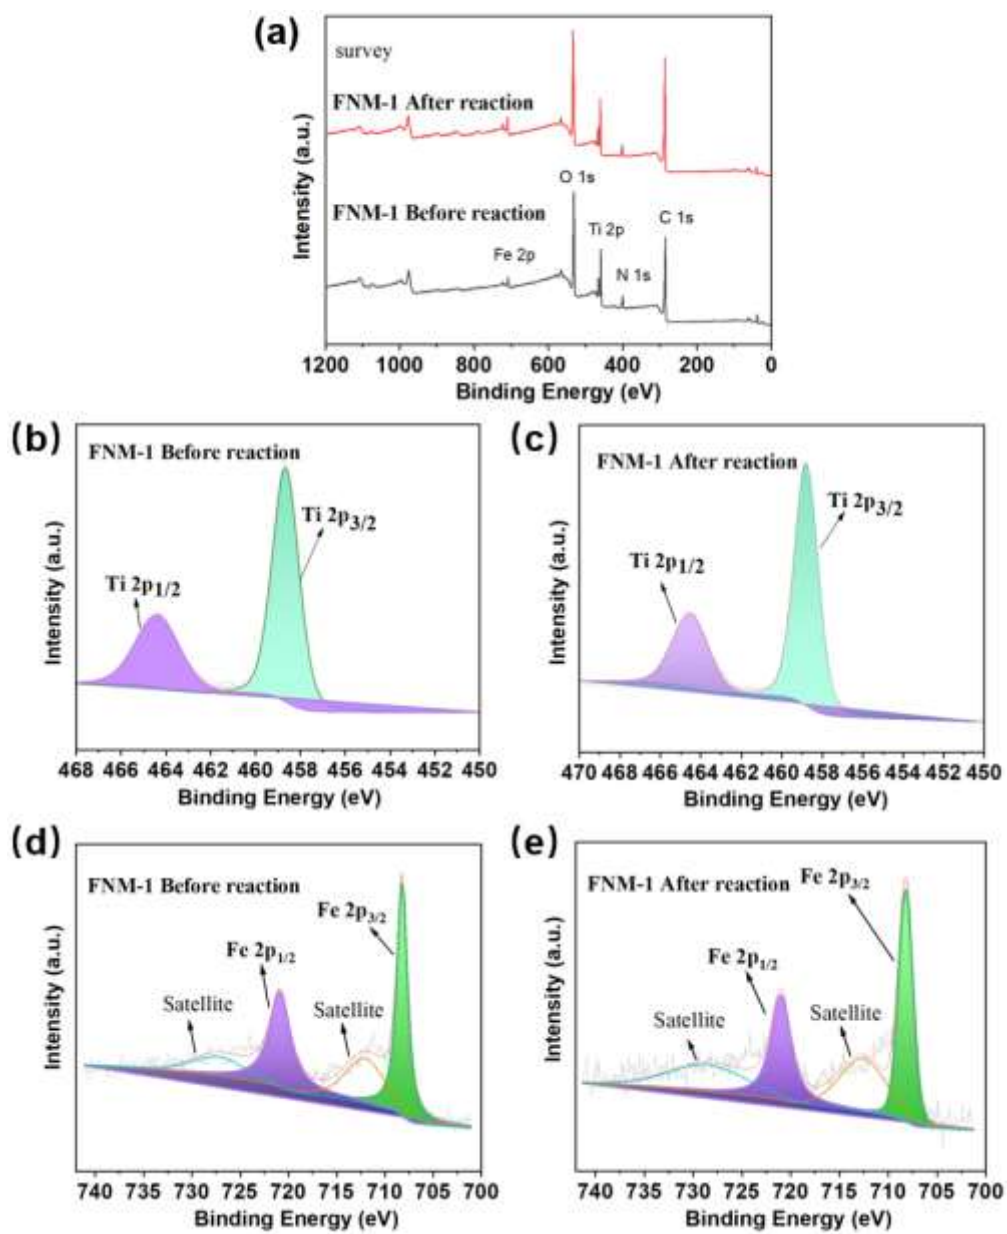

**Figure S12.** The full-scan and high-resolution XPS spectra of FNM-1 before and after reaction.

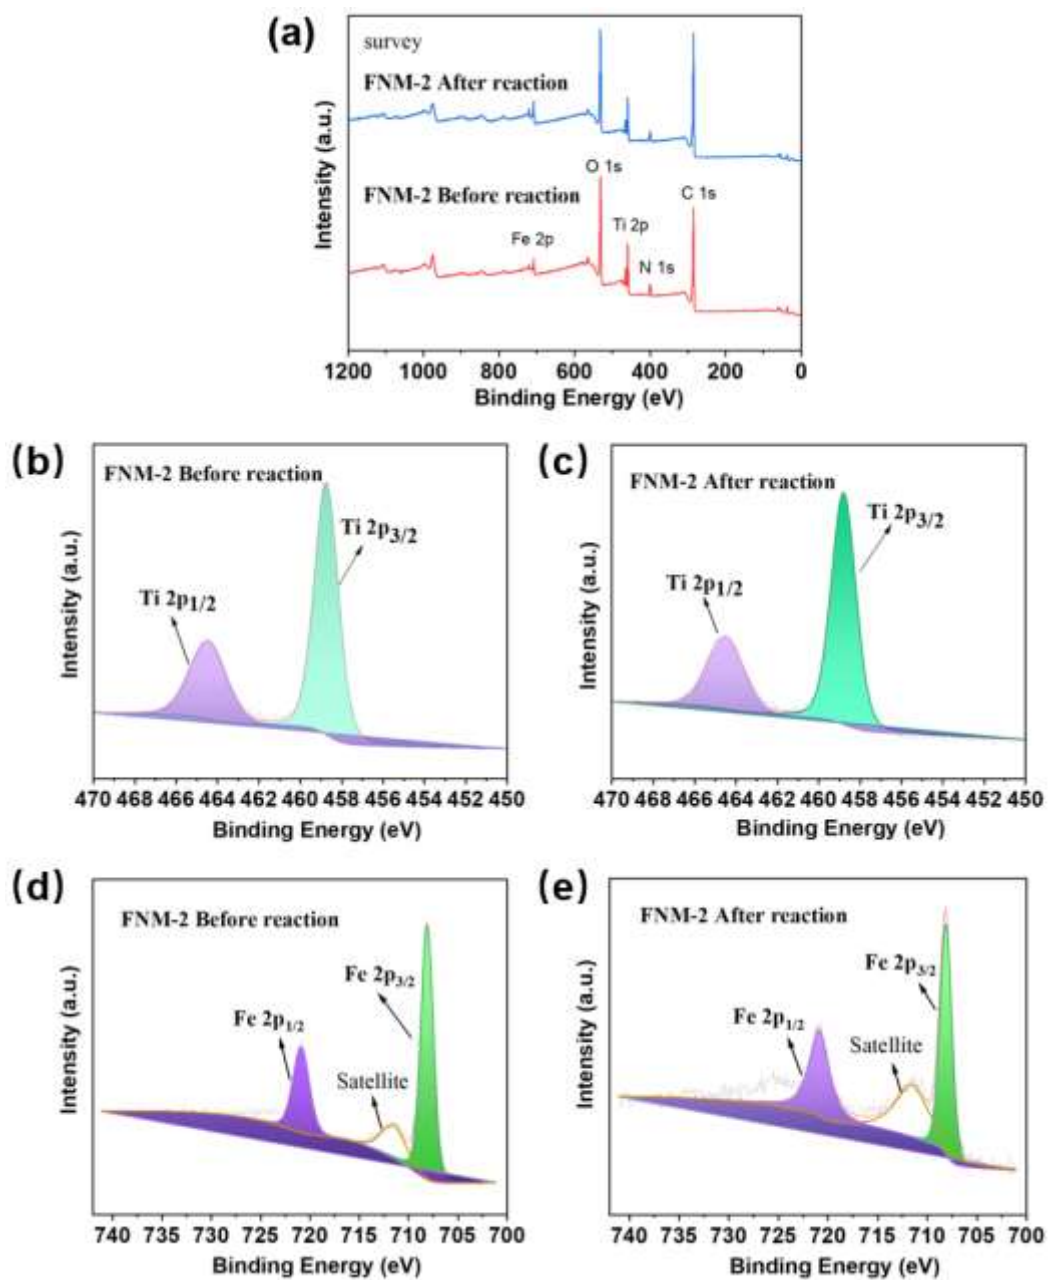

**Figure S13.** The full-scan and high-resolution XPS spectra of FNM-2 before and after reaction.

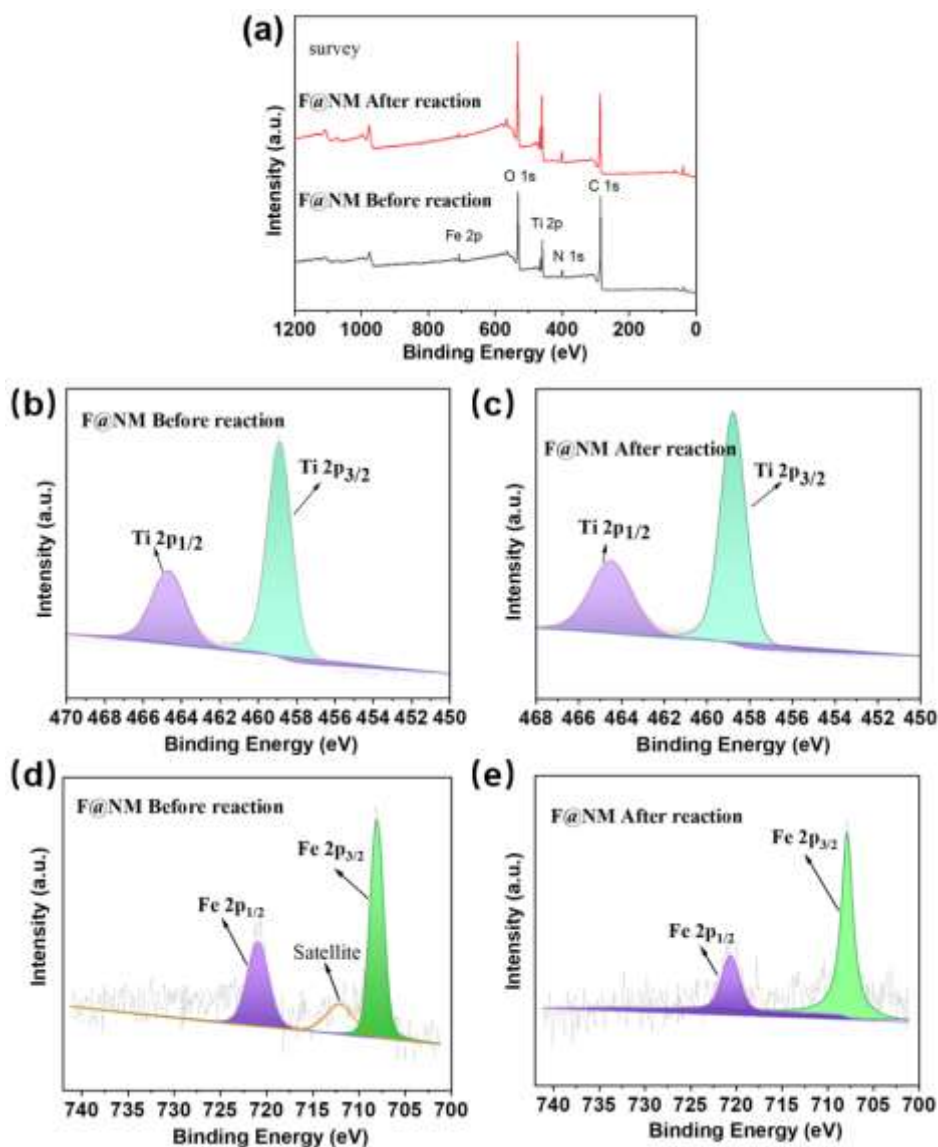

**Figure S14.** The full-scan and high-resolution XPS spectra of **F@NM** before and after reaction.

The X-ray photoelectron spectroscopy (XPS) characterization was further performed to identify the chemical valence states of Ti and Fe atoms of these MOFs before and after photocatalytic reaction. As shown in Figure S11, the Ti 2p spectrum of NM exhibits that the peak at 458.8 eV is the state of Ti 2p<sub>2/3</sub>, while the peak at 464.6 eV refers to the state of Ti 2p<sub>1/2</sub>. Moreover, the binding energies of Ti 2p<sub>2/3</sub> and Ti 2p<sub>1/2</sub> before and after photocatalytic reaction are almost unchanged, indicating the high structural stability of NM. For ferrocene-based MOF photocatalysts (**FNM-1**, **FNM-2** and **F@NM**), their Ti 2p and Fe 2p spectra also keep the same before and after reaction, as demonstrated in Figure S12-S14. The high-resolution Fe 2p spectra of **FNM-1**, **FNM-2** and **F@NM** clearly display two characteristic peaks of 708.1 eV (Fe 2p<sub>2/3</sub>) and 720.9 eV (Fe 2p<sub>1/2</sub>), which indicates the unique existence of Fe<sup>2+</sup> in these MOFs.

**Table S1.** Control experiments under different conditions for the photocatalytic CO<sub>2</sub> reduction reaction.

| <b>Entry 1</b>   | <b><sup>[b]</sup>HCOOH<br/>(<math>\mu\text{mol}</math>)</b> | <b><sup>[c]</sup>CO (<math>\mu\text{mol}</math>)</b> | <b><sup>[d]</sup>H<sub>2</sub> (<math>\mu\text{mol}</math>)</b> |
|------------------|-------------------------------------------------------------|------------------------------------------------------|-----------------------------------------------------------------|
| <b>NM</b>        | 7.58                                                        | 0.11                                                 | 0                                                               |
| 1 <sup>[e]</sup> | n.d. <sup>[f]</sup>                                         | n.d. <sup>[f]</sup>                                  | n.d. <sup>[f]</sup>                                             |
| 2 <sup>[g]</sup> | n.d.                                                        | n.d.                                                 | n.d.                                                            |
| 3 <sup>[h]</sup> | n.d.                                                        | n.d.                                                 | n.d.                                                            |
| 4 <sup>[i]</sup> | n.d.                                                        | n.d.                                                 | Trace amount                                                    |
| <b>Entry 2</b>   | <b><sup>[b]</sup>HCOOH<br/>(<math>\mu\text{mol}</math>)</b> | <b><sup>[c]</sup>CO (<math>\mu\text{mol}</math>)</b> | <b><sup>[d]</sup>H<sub>2</sub> (<math>\mu\text{mol}</math>)</b> |
| <b>FNM-1</b>     | 10.66                                                       | 0.27                                                 | 0                                                               |
| 1 <sup>[e]</sup> | n.d. <sup>[f]</sup>                                         | n.d. <sup>[f]</sup>                                  | n.d. <sup>[f]</sup>                                             |
| 2 <sup>[g]</sup> | n.d.                                                        | n.d.                                                 | n.d.                                                            |
| 3 <sup>[h]</sup> | n.d.                                                        | n.d.                                                 | n.d.                                                            |
| 4 <sup>[i]</sup> | n.d.                                                        | n.d.                                                 | Trace amount                                                    |
| <b>Entry 3</b>   | <b><sup>[b]</sup>HCOOH<br/>(<math>\mu\text{mol}</math>)</b> | <b><sup>[c]</sup>CO (<math>\mu\text{mol}</math>)</b> | <b><sup>[d]</sup>H<sub>2</sub> (<math>\mu\text{mol}</math>)</b> |
| <b>FNM-2</b>     | 14.76                                                       | 0.66                                                 | 0                                                               |
| 1 <sup>[e]</sup> | n.d. <sup>[f]</sup>                                         | n.d. <sup>[f]</sup>                                  | n.d. <sup>[f]</sup>                                             |
| 2 <sup>[g]</sup> | n.d.                                                        | n.d.                                                 | n.d.                                                            |
| 3 <sup>[h]</sup> | n.d.                                                        | n.d.                                                 | n.d.                                                            |
| 4 <sup>[i]</sup> | n.d.                                                        | n.d.                                                 | Trace amount                                                    |
| <b>Entry 4</b>   | <b><sup>[b]</sup>HCOOH<br/>(<math>\mu\text{mol}</math>)</b> | <b><sup>[c]</sup>CO (<math>\mu\text{mol}</math>)</b> | <b><sup>[d]</sup>H<sub>2</sub> (<math>\mu\text{mol}</math>)</b> |
| <b>F@NM</b>      | 8.45                                                        | 0.71                                                 | 0                                                               |
| 1 <sup>[e]</sup> | n.d. <sup>[f]</sup>                                         | n.d. <sup>[f]</sup>                                  | n.d. <sup>[f]</sup>                                             |
| 2 <sup>[g]</sup> | n.d.                                                        | n.d.                                                 | n.d.                                                            |
| 3 <sup>[h]</sup> | n.d.                                                        | n.d.                                                 | n.d.                                                            |
| 4 <sup>[i]</sup> | n.d.                                                        | n.d.                                                 | Trace amount                                                    |

[a] Reaction conditions: catalyst (entry 1 is activated **NM**, entry 2 is activated **FNM-1**, entry 3 is

activated **FNM-2**, entry 4 is activated **F@NM**; H<sub>2</sub>O (28 mL), TEOA (2 mL); CO<sub>2</sub> (1 atm);  $\lambda = 200$ -400 nm (UV light); 30 °C, 10 h. [b] The HCOOH production rate. [c] The CO production rate. [d] The H<sub>2</sub> production rate. [e] In the dark. [f] Not detectable (n.d.). [g] Without catalyst. [h] Without TEOA. [i] Using N<sub>2</sub> to replace CO<sub>2</sub>.

**Table S2.** Comparison of the photocatalytic performance of reported photocatalysts for CO<sub>2</sub>-to-HCOOH conversion under visible light irradiation.

| Photocatalyst                         | Solvent          | PS/PM                          | SA   | HCOOH( $\mu\text{mol/g/h}$ )                  | Reference |
|---------------------------------------|------------------|--------------------------------|------|-----------------------------------------------|-----------|
| <b>NM</b>                             | H <sub>2</sub> O | None                           | TEOA | 67.33 <sup>[a]</sup> ; 151.60 <sup>[b]</sup>  | this work |
| <b>FNM-1</b>                          | H <sub>2</sub> O | None                           | TEOA | 136.33 <sup>[a]</sup> ; 213.20 <sup>[b]</sup> | this work |
| <b>FNM-2</b>                          | H <sub>2</sub> O | None                           | TEOA | 266.33 <sup>[a]</sup> ; 293.40 <sup>[b]</sup> | this work |
| <b>F@NM</b>                           | H <sub>2</sub> O | None                           | TEOA | 88.66 <sup>[a]</sup> ; 169.00 <sup>[b]</sup>  | this work |
| NH <sub>2</sub> -MIL-125(Ti)          | MeCN             | None                           | TEOA | 16.28                                         | [1]       |
| NH <sub>2</sub> -MIL-101(Fe)          | MeCN             | None                           | TEOA | 445                                           | [2]       |
| NH <sub>2</sub> -MIL-53(Fe)           | MeCN             | None                           | TEOA | 116.25                                        | [2]       |
| NH <sub>2</sub> -MIL-88B(Fe)          | MeCN             | None                           | TEOA | 75.0                                          | [2]       |
| H <sub>2</sub> N-UIO-66(Zr)           | MeCN             | None                           | TEOA | 46.3                                          | [3]       |
| UiO-66-(Zr/Ti)-NH <sub>2</sub>        | MeCN             | None                           | TEOA | 5.8 mmol mol <sup>-1</sup>                    | [4]       |
| NNU-28                                | MeCN             | None                           | TEOA | 183.3                                         | [5]       |
| PCN-222                               | H <sub>2</sub> O | None                           | TEOA | 143.5                                         | [6]       |
| AD-MOF-1                              | MeCN             | None                           | TIPA | 179.0                                         | [7]       |
| AD-MOF-2                              | H <sub>2</sub> O | None                           | TIPA | 443.2                                         | [7]       |
| <b>COF-367-Co<sup>II</sup></b>        | MeCN             | None                           | TEA  | 48.6                                          | [8]       |
| <b>COF-367-Co<sup>III</sup></b>       | MeCN             | None                           | TEA  | 93.0                                          | [8]       |
| CTF                                   | PBS              | Rh[Cp*Rh(bpy)H <sub>2</sub> O] | Vc   | 881.3 $\times 10^3$                           | [9]       |
| TpBD-H <sub>2</sub>                   | MeCN             | None                           | TEOA | 45.7                                          | [10]      |
| TpBD-(CH <sub>3</sub> ) <sub>2</sub>  | MeCN             | None                           | TEOA | 86.3                                          | [10]      |
| TpBD-(OCH <sub>3</sub> ) <sub>2</sub> | MeCN             | None                           | TEOA | 108.3                                         | [10]      |
| TpBD-(NO <sub>2</sub> ) <sub>2</sub>  | MeCN             | None                           | TEOA | 22.2                                          | [10]      |



|                                      |                  |                                                         |      |           |      |
|--------------------------------------|------------------|---------------------------------------------------------|------|-----------|------|
| MCOF-Ti <sub>6</sub> Cu <sub>3</sub> | H <sub>2</sub> O | None                                                    | None | 169.8     | [11] |
| DQTP COF-Co                          | MeCN             | Ru(bpy) <sub>3</sub> Cl <sub>2</sub> ·6H <sub>2</sub> O | TEA  | 34.87μmol | [12] |
| DQTP COF-Co                          | MeCN             | Ru(bpy) <sub>3</sub> Cl <sub>2</sub> ·6H <sub>2</sub> O | TIPA | 33.38μmol | [12] |
| DQTP COF-Co                          | H <sub>2</sub> O | Ru(bpy) <sub>3</sub> Cl <sub>2</sub> ·6H <sub>2</sub> O | TEOA | 94.68μmol | [12] |

PS: photosensitizer; PM: precious metal; SA: sacrificial agent TEOA: triethanolamine; TIPA: triisopropanolamine; PBS: sodium phosphate buffer; Vc: ascorbic acid; TEA: triethylamine.

[a] Reaction conditions: Visible light

[b] Reaction conditions:  $\lambda = 200\text{-}400\text{ nm}$  (UV light)

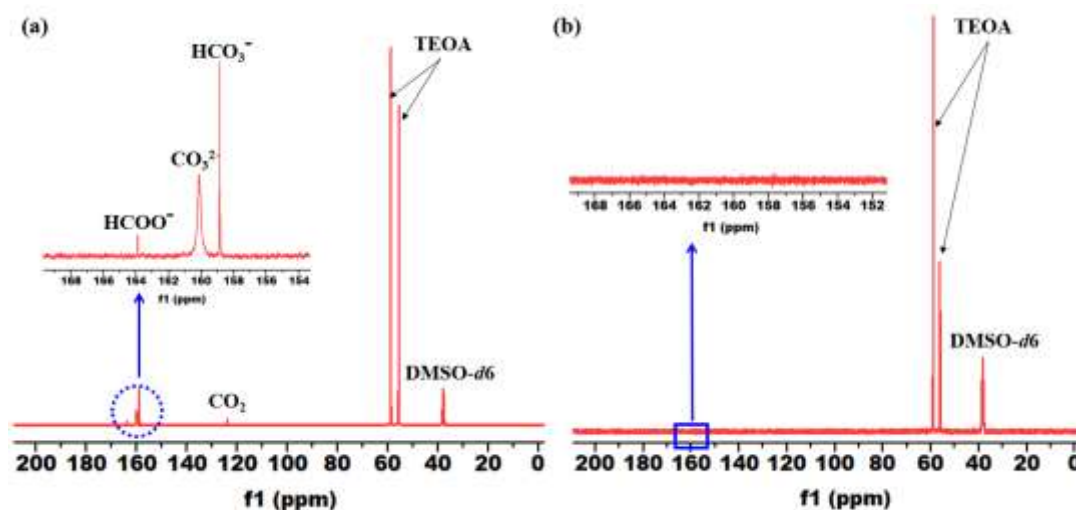

**Figure S15.** (a) <sup>13</sup>C NMR spectrum of reaction solution catalyzed with FNM-2 photocatalyst under <sup>13</sup>CO<sub>2</sub> atmosphere, the HCOO<sup>-</sup> signal at 163.9 ppm was clearly observed. (b) <sup>13</sup>C NMR spectroscopy for the liquid products obtained from reaction with <sup>12</sup>CO<sub>2</sub>. Peaks that do not show any product.

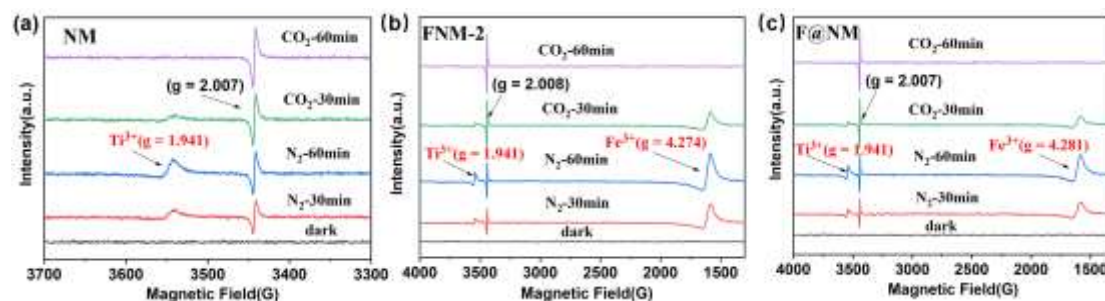

**Figure S16.** EPR spectra of NM, FNM-2 and F@NM under UV light irradiation and a CO<sub>2</sub> or N<sub>2</sub> atmosphere.

## Reference

- (1) Y. Fu, D. Sun, Y. Chen, R. Huang, Z. Ding, X. Fu, and Z. Li. *Angew. Chem. Int. Ed.* **2012**, *51*, 3364–3367.
- (2) D. Wang, R. Huang, W. Liu, D. Sun, and Z. Li. *ACS Catal.* **2014**, *4*, 4254–4260.
- (3) D. Sun, Y. Fu, W. Liu, L. Ye, D. Wang, L. Yang, X. Fu, and Z. Li. *Chem. Eur. J.* **2013**, *19*, 14279–14285.
- (4) D. Sun, W. Liu, M. Qiu, Y. Zhang, Z. Li. *Chem. Commun.*, **2015**, *51*, 2056–2059.
- (5) D. Chen, H. Xing, C. Wang and Z. Su. *J. Mater. Chem. A*, **2016**, *4*, 2657–2662.
- (6) H.-Q. Xu, J. Hu, D. Wang, Z. Li, Q. Zhang, Y. Luo, S.-H. Yu, and H.-L. Jiang. *J. Am. Chem. Soc.* **2015**, *137*, 13440–13443.
- (7) N. Li, J. Liu, J. J. Liu, L. Z. Dong, Z. F. Xin, Y. L. Teng and Y. Q. Lan. *Angew. Chem. Int. Ed.*, **2019**, *58*, 5226–5231.
- (8) Y.-N. Gong, W.-H. Zhong, Y. Li, Y.-Z. Qiu, L.-R. Zheng, J. Jiang, and H.-L. Jiang. *J. Am. Chem. Soc.* **2020**, *142*, 16723–16731.
- (9) R. K. Yadav , A. Kumar , N.-J. Park , K.-J. Kong and J.-O. Baeg. *J. Mater. Chem. A*, **2016**, *4* , 9413–9418.
- (10) L. Peng, S. Chang , Z. Liu , Y. Fu , R. Ma , X. Lu , F. Zhang , W. Zhu , L. Kong and M. Fan. *Catal. Sci. Technol.*, **2021**, *11*, 1717–1724.
- (11) J. Zhou, J. Li, L.K, L. Zhang, Q. Huang, Y. Yan, Y.-F. Chen, J. Liu, S.-L. Li, and Y.-Q. Lan. *Nat. Commun.*, **2022** *13*:4681.
- (12) M. Lu, Q. Li, J. Liu, F.-M. Zhang, L. Zhang, J.-L. Wang, Z.-H. Kang, and Y.-Q. Lan. *Appl. Catal. B Environ.*, **2019**, *254*, 624–633.
